# Supplementary material
Source: Springer Nature journal article supplement (https://www.springermedizin.de/resource/supplementary/12889_2014_7385_MOESM2_ESM.pdf/9497508)
Supplement: MOESM2 [file 9497508]

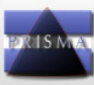

# PRISMA 2009 Flow Diagram

Identification

Records identified through  
database searching  
(n = 11,994)

Additional records identified  
through other sources  
(n = 0)

Screening

Records after duplicates removed  
(n = 6,759)

Records screened  
(n = 6,759)

Records excluded  
(n = 6,730)

Eligibility

Full-text articles assessed  
for eligibility  
(n = 29)

Full-text articles excluded,  
with reasons  
(n = 13)

Included

Studies included in  
qualitative synthesis  
(n = 16)

Studies included in  
quantitative synthesis  
(meta-analysis)  
(n = 0)
